# Supplementary material for: Designed synthesis of porous NiMoO4/C composite nanorods for asymmetric supercapacitors
Source: Royal Society of Chemistry journal article supplement (doi:10.1039/c9ce01031a), 2019-01-01
Supplement: c9ce01031a1.pdf [file c9ce01031a1.pdf]

## Electronic supplementary information

### Design Synthesis of Porous NiMoO<sub>4</sub>/C Composite Nanorods for Asymmetric Supercapacitors

Boli Tong,<sup>a</sup> Wutao Wei,<sup>a</sup> Xueli Chen,<sup>a</sup> Jing Wang,<sup>a</sup> Wanyu Ye,<sup>a</sup> Shizhong Cui,<sup>a</sup> Weihua Chen,<sup>b,\*</sup> and Liwei Mi<sup>a,\*</sup>

<sup>a</sup> Center for Advanced Materials Research, Zhongyuan University of Technology, Henan 450007, China. E-mail: mlwzzu@163.com

<sup>b</sup> College of Chemistry and Molecular Engineering, Zhengzhou University, Henan 450001, China. E-mail: chenweih@zzu.edu.cn

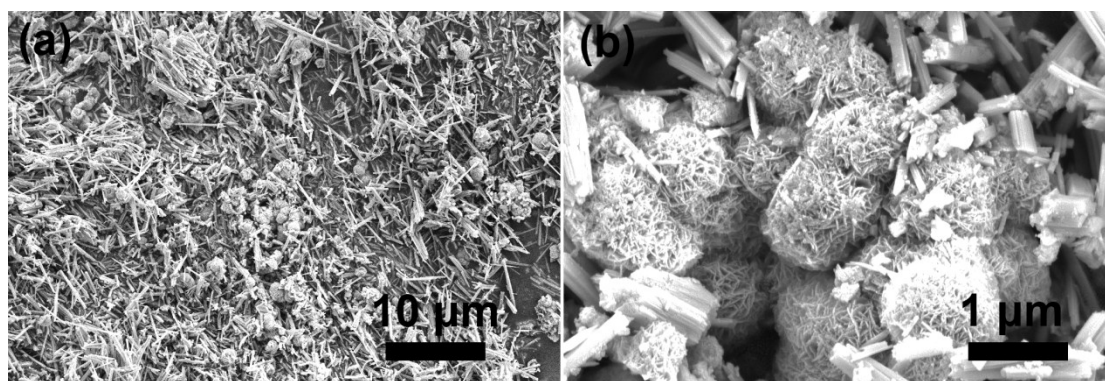

**Figure S1.** (a-b) SEM image with different magnification of NMO-P prepared with only water as solvent.

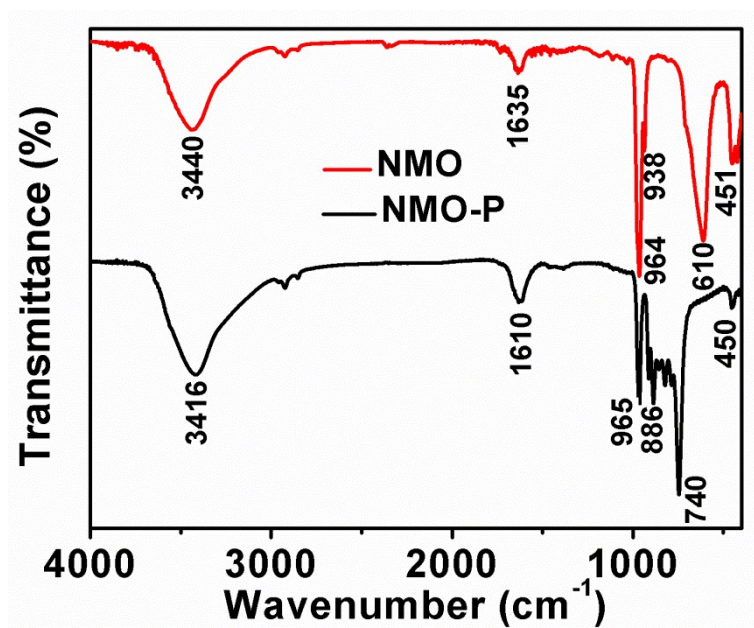

**Figure S2.** FTIR spectrum of NMO-P and NMO/C composite nanorods at wavenumber from 400  $\text{cm}^{-1}$  to 4000  $\text{cm}^{-1}$ .

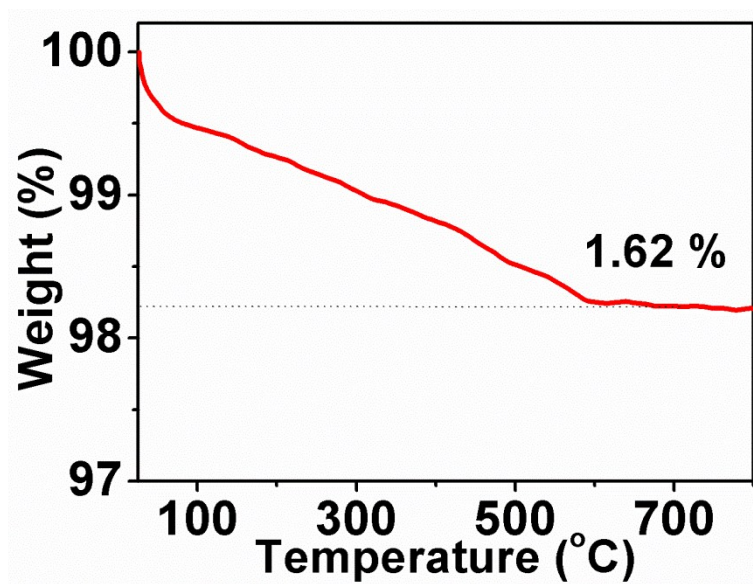

**Figure S3.** Thermogravimetric curve of NMO/C under N<sub>2</sub> atmosphere with a heating rate of 10 °C min<sup>-1</sup>.

**Table S1.** Comparison of specific capacitance of NMO/C in this study and those of some NMO-based electrodes

| Electrode material                                      | Two-electrodes (specific capacitance@current density)                 | Ref.      |
|---------------------------------------------------------|-----------------------------------------------------------------------|-----------|
| NiMoO <sub>4</sub> /PANI                                | 1.34 F cm <sup>-2</sup> @1 mA cm <sup>-2</sup>                        | 32        |
| NiMoO <sub>4</sub> @CoMoO <sub>4</sub>                  | 112.2 F g <sup>-1</sup> @2 A g <sup>-1</sup>                          | 33        |
| NF@NiMoO <sub>4</sub> @C                                | 201.3 F g <sup>-1</sup> @1 A g <sup>-1</sup>                          | 34        |
| NiMoO <sub>4</sub> @CMS                                 | 137.5 F g <sup>-1</sup> @1 A g <sup>-1</sup>                          | 40        |
| NiMoO <sub>4</sub> @C@Ni <sub>3</sub> S <sub>2</sub>    | 0.47 F cm <sup>-2</sup> @2 mA cm <sup>-2</sup>                        | 41        |
| NiMoO <sub>4</sub> -HCNF                                | 135 C g <sup>-1</sup> @0.5 A g <sup>-1</sup>                          | 42        |
| NiMoO <sub>4</sub> nanosheet                            | 151.7 F g <sup>-1</sup> @1 A g <sup>-1</sup>                          | 43        |
| NiCo <sub>2</sub> O <sub>4</sub> @NiMoO <sub>4</sub>    | 61.7 F g <sup>-1</sup> @5 mA cm <sup>-2</sup>                         | 44        |
| NiMoO <sub>4</sub> nanorods                             | 96.7 F g <sup>-1</sup> @5 mA cm <sup>-2</sup>                         | 45        |
| NiMoO <sub>4</sub> -CoMoO <sub>4</sub>                  | 80 F g <sup>-1</sup> @1 mA cm <sup>-2</sup>                           | 46        |
| NiMoO <sub>4</sub> -CoMoO <sub>4</sub> nanotubes        | 105 F g <sup>-1</sup> @5 mA cm <sup>-2</sup> (0.5 A g <sup>-1</sup> ) | 47        |
| PCNS@Co <sub>x</sub> Ni <sub>1-x</sub> MoO <sub>4</sub> | 127.5 F g <sup>-1</sup> @0.5 A g <sup>-1</sup>                        | 48        |
| NiMoO <sub>4</sub> /C                                   | 325.1 F g <sup>-1</sup> @0.5 A g <sup>-1</sup>                        | This work |
